# Supplementary material for: A Comparison of Active Pharmacovigilance Strategies Used to Monitor Adverse Events to Antiviral Agents: A Systematic Review
Source: PubMed Central journal article supplement — Drug Saf. 2024 Aug 19;47(12):1203–24. doi: 10.1007/s40264-024-01470-0 (PMC11554745; doi:10.1007/s40264-024-01470-0), 2024-08-19
Supplement: 40264_2024_1470_MOESM1_ESM.pdf [file 40264_2024_1470_MOESM1_ESM.pdf]

## ***Drug Safety***

### **A comparison of active pharmacovigilance strategies used to monitor adverse events to antiviral agents: a systematic review**

Renato Ferreira-da-Silva,<sup>1,2,3</sup> Joana Reis Pardal<sup>2,3</sup>, Manuela Pinto<sup>4</sup>, Matilde Monteiro-Soares<sup>2,3,5,6</sup>, Bernardo Sousa-Pinto<sup>2,3</sup>, Manuela Morato<sup>7,8</sup>, Jorge Junqueira Polónia<sup>1,2,9</sup>, Inês Ribeiro-Vaz<sup>1,2,3</sup>

1. Porto Pharmacovigilance Centre, Faculty of Medicine of the University of Porto, Porto, Portugal.
2. Center for Health Technology and Services Research, Associate Laboratory RISE – Health Research Network (CINTESIS@RISE), Porto, Portugal.
3. Department of Community Medicine, Information and Health Decision Sciences (MEDCIDS), Faculty of Medicine of the University of Porto (FMUP), Porto, Portugal.
4. São João University Hospital Centre, Porto, Portugal.
5. Portuguese Red Cross Health School – Lisbon, Lisbon, Portugal
6. Cross I&D, Lisbon, Portugal
7. Laboratory of Pharmacology, Department of Drug Sciences, Faculty of Pharmacy of the University of Porto, Porto, Portugal.
8. LAQV@REQUIMTE, Faculty of Pharmacy of the University of Porto, Porto, Portugal.
9. Department of Medicine, Faculty of Medicine of the University of Porto, Porto, Portugal.

#### **Corresponding author:**

Renato Ferreira da Silva, MPharm, Cand. PhD

Porto Pharmacovigilance Centre, Faculty of Medicine of the University of Porto, Porto, Portugal.

Email: [renato.ivos@gmail.com](mailto:renato.ivos@gmail.com)

## Supplementary Material

**Table S1.** Description of the concepts used in the systematic review.

| Concept                         | Description                                                                                                                                                                                                                                                                                                                                                                                                                                                                                                                                |
|---------------------------------|--------------------------------------------------------------------------------------------------------------------------------------------------------------------------------------------------------------------------------------------------------------------------------------------------------------------------------------------------------------------------------------------------------------------------------------------------------------------------------------------------------------------------------------------|
| <b>Active pharmacovigilance</b> | <i>“Active surveillance, in contrast to passive surveillance, seeks to ascertain completely the number of adverse events via a continuous pre-organised process. An example of active surveillance is the follow-up of patients treated with a particular drug through a risk management program. (...) In general, it is more feasible to get comprehensive data on individual adverse event reports through an active surveillance system than through a passive reporting system”, by ICH E2E Pharmacovigilance planning guideline.</i> |
| <b>Adverse event</b>            | <i>“(...) any untoward medical occurrence in a patient or clinical trial subject administered a medicinal product and which does not necessarily have a causal relationship with this treatment. An adverse event can therefore be any unfavourable and unintended sign (e.g. an abnormal laboratory finding), symptom, or disease temporally associated with the use of a medicinal product, whether or not considered related to the medicinal product”, by Good Pharmacovigilance Practices of the European Medicines Agency.</i>       |
| <b>Antiviral agent</b>          | <i>“(...) drugs approved by the Food and Drug Administration (FDA) for the treatment or control of viral infections. They target stages in the viral life cycle. An ideal antiviral agent should be effective against both actively replicating and latent viruses; however, most of the available antiviral agents are effective against only replicating viruses”, by Encyclopedia of Microbiology.</i>                                                                                                                                  |

**Table S2.** Queries used for searching MEDLINE/PubMed, Web of Science and Scopus.

| Search | MEDLINE/PubMed Search Strategy                                                                                                                                                                                                                                                                                                                                                                                                                                                                                                                                                                                                                                                                                                                                                                                                                                                                                                                                                                                                                                                                                                                                                                                                                                                               | Items found |
|--------|----------------------------------------------------------------------------------------------------------------------------------------------------------------------------------------------------------------------------------------------------------------------------------------------------------------------------------------------------------------------------------------------------------------------------------------------------------------------------------------------------------------------------------------------------------------------------------------------------------------------------------------------------------------------------------------------------------------------------------------------------------------------------------------------------------------------------------------------------------------------------------------------------------------------------------------------------------------------------------------------------------------------------------------------------------------------------------------------------------------------------------------------------------------------------------------------------------------------------------------------------------------------------------------------|-------------|
|        | <b>1<sup>st</sup> Concept - terms relating to active pharmacovigilance strategies</b>                                                                                                                                                                                                                                                                                                                                                                                                                                                                                                                                                                                                                                                                                                                                                                                                                                                                                                                                                                                                                                                                                                                                                                                                        |             |
| #1     | <p>“Product Surveillance, Postmarketing”[mh] OR “Post-Marketing Product Surveillance”[tw] OR “Postmarketing Product Surveillance”[tw] OR “Product Surveillance”[tw] OR “Postmarketing Evaluation Stud*”[tw] OR “Drug Surveillance*”[tw] OR “Pharmacovigilance”[mh] OR “Pharmacovigilance*”[tw] OR “Active Pharmacovigilance”[tw] OR “Pharmacoepidemiology”[mh] OR “Pharmacoepidemiology”[tw] OR “Pharmaceutical Epidemiology”[tw] OR “Adverse Drug Reaction Reporting Systems”[mh] OR “Adverse Drug Reaction Reporting System*”[tw] OR “Drug Reporting System*”[tw] OR “Reporting System*”[tw] OR "Drug-Related Side Effects and Adverse Reactions"[mh] OR “Adverse Drug Reaction*”[tw] OR “Adverse Drug Event*”[tw] OR “Drug Side Effect*”[tw] OR “Side Effects of Drugs”[tw] OR “Drug Toxicit*”[tw] OR “Prescription Event Monitoring”[tw] OR “Prescription Monitoring*”[tw] OR “Prescription Drug Monitoring Program”[tw] OR (“Sentinel Surveillance”[mh] OR “Sentinel Surveillance”[tw] OR “sentinel initiative”[tw] OR “Mini-Sentinel”[tw] OR “Active Surveillance”[tw]) AND (“Drug-Related Side Effects and Adverse Reactions”[mh] OR “Adverse Drug Reaction*”[tw] OR “Adverse Drug Event*”[tw] OR “Drug Side Effect*”[tw] OR “Side Effects of Drugs”[tw] OR “Drug Toxicit*”[tw]))</p> |             |
|        | <b>2<sup>nd</sup> Concept – terms relating to antiviral agents</b>                                                                                                                                                                                                                                                                                                                                                                                                                                                                                                                                                                                                                                                                                                                                                                                                                                                                                                                                                                                                                                                                                                                                                                                                                           |             |
| #2     | <p>“Antiviral Agents" OR "Anti-Retroviral Agents" OR "Virus Inactivation" OR "Antiviral Agents" [Pharmacological Action] OR “Anti-infective Agent*”[tw] OR “Antiinfective Agent*”[tw] OR “Antiviral*”[tw] OR “Anti-retroviral*”[tw] OR “Antiretroviral*”[tw] OR “Virus Inactivation”[tw]</p>                                                                                                                                                                                                                                                                                                                                                                                                                                                                                                                                                                                                                                                                                                                                                                                                                                                                                                                                                                                                 |             |
|        | <b>3<sup>rd</sup> Concept – terms relating to the outcome</b>                                                                                                                                                                                                                                                                                                                                                                                                                                                                                                                                                                                                                                                                                                                                                                                                                                                                                                                                                                                                                                                                                                                                                                                                                                |             |
| #3     | <p>Incidence[tw] OR prevalence[tw]</p>                                                                                                                                                                                                                                                                                                                                                                                                                                                                                                                                                                                                                                                                                                                                                                                                                                                                                                                                                                                                                                                                                                                                                                                                                                                       |             |
| #4     | <b>#1 AND #2 AND #3</b>                                                                                                                                                                                                                                                                                                                                                                                                                                                                                                                                                                                                                                                                                                                                                                                                                                                                                                                                                                                                                                                                                                                                                                                                                                                                      | <b>1087</b> |

| Search                                                                                | Web of Science Search Strategy                                                                                                                                                                                                                                                                                                                                                                                                                                                                                                                                                                                                                                                                                                                                                                                                                                                | Items found |
|---------------------------------------------------------------------------------------|-------------------------------------------------------------------------------------------------------------------------------------------------------------------------------------------------------------------------------------------------------------------------------------------------------------------------------------------------------------------------------------------------------------------------------------------------------------------------------------------------------------------------------------------------------------------------------------------------------------------------------------------------------------------------------------------------------------------------------------------------------------------------------------------------------------------------------------------------------------------------------|-------------|
| <b>1<sup>st</sup> Concept - terms relating to active pharmacovigilance strategies</b> | <p>“Post-Marketing Product Surveillance” OR “Postmarketing Product Surveillance” OR “Product Surveillance” OR “Postmarketing Evaluation Stud*” OR “Drug Surveillance*” OR “Pharmacovigilance*” OR “Active Pharmacovigilance” OR “Pharmacoepidemiology” OR “Pharmaceutical Epidemiology” OR “Adverse Drug Reaction Reporting System*” OR “Drug Reporting System*” OR “Reporting System*” OR “Adverse Drug Reaction*” OR “Adverse Drug Event*” OR “Drug Side Effect*” OR “Side Effects of Drugs” OR “Drug Toxicit*” OR “Prescription Event Monitoring” OR “Prescription Monitoring*” OR “Prescription Drug Monitoring Program” OR (“Sentinel Surveillance” OR “sentinel initiative” OR “Mini-Sentinel” OR “Active Surveillance”) AND (“Adverse Drug Reaction*” OR “Adverse Drug Event*” OR “Drug Side Effect*” OR “Side Effects of Drugs” OR “Drug Toxicit*”)) (All Fields)</p> |             |
| #2                                                                                    | <p><b>2<sup>nd</sup> Concept – terms relating to antiviral agents</b></p> <p>“Anti-infective Agent*” OR “Antiinfective Agent*” OR “Antiviral*” OR “Anti-retroviral*” OR “Antiretroviral*” OR “Virus Inactivation” (All Fields)</p>                                                                                                                                                                                                                                                                                                                                                                                                                                                                                                                                                                                                                                            |             |
| #3                                                                                    | <p><b>3<sup>rd</sup> Concept – terms relating to the outcome</b></p> <p>Incidence OR prevalence (All Fields)</p>                                                                                                                                                                                                                                                                                                                                                                                                                                                                                                                                                                                                                                                                                                                                                              |             |
| #4                                                                                    | #1 AND #2 AND #3                                                                                                                                                                                                                                                                                                                                                                                                                                                                                                                                                                                                                                                                                                                                                                                                                                                              | 473         |

| Search                                                                                | Scopus Search Strategy                                                                                                                                                                                                                                                                                                                                                                                                                                                                                                                                                                                                                                                                                                                                                                                                                                                   | Items found |
|---------------------------------------------------------------------------------------|--------------------------------------------------------------------------------------------------------------------------------------------------------------------------------------------------------------------------------------------------------------------------------------------------------------------------------------------------------------------------------------------------------------------------------------------------------------------------------------------------------------------------------------------------------------------------------------------------------------------------------------------------------------------------------------------------------------------------------------------------------------------------------------------------------------------------------------------------------------------------|-------------|
| <b>1<sup>st</sup> Concept - terms relating to active pharmacovigilance strategies</b> |                                                                                                                                                                                                                                                                                                                                                                                                                                                                                                                                                                                                                                                                                                                                                                                                                                                                          |             |
| #1                                                                                    | TITLE-ABS-KEY (“Post-Marketing Product Surveillance” OR “Postmarketing Product Surveillance” OR “Product Surveillance” OR “Postmarketing Evaluation Stud*” OR “Drug Surveillance*” OR “Pharmacovigilance*” OR “Active Pharmacovigilance” OR “Pharmacoepidemiology” OR “Pharmaceutical Epidemiology” OR “Adverse Drug Reaction Reporting System*” OR “Drug Reporting System*” OR “Reporting System*” OR “Adverse Drug Reaction*” OR “Adverse Drug Event*” OR “Drug Side Effect*” OR “Side Effects of Drugs” OR “Drug Toxicit*” OR “Prescription Event Monitoring” OR “Prescription Monitoring*” OR “Prescription Drug Monitoring Program” OR (“Sentinel Surveillance” OR “sentinel initiative” OR “Mini-Sentinel” OR “Active Surveillance”) AND (“Adverse Drug Reaction*” OR “Adverse Drug Event*” OR “Drug Side Effect*” OR “Side Effects of Drugs” OR “Drug Toxicit*”)) |             |
| <b>2<sup>nd</sup> Concept – terms relating to antiviral agents</b>                    |                                                                                                                                                                                                                                                                                                                                                                                                                                                                                                                                                                                                                                                                                                                                                                                                                                                                          |             |
| #2                                                                                    | TITLE-ABS-KEY (“Anti-infective Agent*” OR “Antiinfective Agent*” OR “Antiviral*” OR “Anti-retroviral*” OR “Antiretroviral*” OR “Virus Inactivation”)                                                                                                                                                                                                                                                                                                                                                                                                                                                                                                                                                                                                                                                                                                                     |             |
| <b>3<sup>rd</sup> Concept – terms relating to the outcome</b>                         |                                                                                                                                                                                                                                                                                                                                                                                                                                                                                                                                                                                                                                                                                                                                                                                                                                                                          |             |
| #3                                                                                    | TITLE-ABS-KEY (Incidence OR prevalence)                                                                                                                                                                                                                                                                                                                                                                                                                                                                                                                                                                                                                                                                                                                                                                                                                                  |             |
| #4                                                                                    | <b>#1 AND #2 AND #3</b>                                                                                                                                                                                                                                                                                                                                                                                                                                                                                                                                                                                                                                                                                                                                                                                                                                                  | <b>1871</b> |

**Table S3.** Categorisation of reported clinical data sources used to obtain patient assessment information.

| <b>Label</b>                                                     | <b>Description</b>                                                                                                                                                                                                             |
|------------------------------------------------------------------|--------------------------------------------------------------------------------------------------------------------------------------------------------------------------------------------------------------------------------|
| Laboratory tests                                                 | Deliberate solicitation and execution of specific laboratory tests as part of the study monitoring process, excluding those conducted within the standard patient care.                                                        |
| Physical examination                                             | In-person physical evaluation conducted by a healthcare professional or researcher within the scope of the study.                                                                                                              |
| Other Complementary Diagnostic and Therapeutic Procedures (CDTP) | Deliberate solicitation and execution of specific CDTP as part of the study monitoring process, excluding those conducted within the standard patient care.                                                                    |
| Medical records                                                  | Extraction of data from patient's clinical records by a healthcare professional or researcher for monitoring purposes.                                                                                                         |
| Patient's interview                                              | Structured or unstructured interview or questionnaire administered to the patient, in-person or remotely, aimed at gathering reports of AE experienced by the patient up to that point.                                        |
| Patient's self-report                                            | Instructions provided to the patient by the researcher or healthcare professional to report the occurrence of any AE.                                                                                                          |
| Healthcare professionals' interview                              | Structured or unstructured interview or questionnaire administered to the healthcare professional caring for the patient, in-person or remotely, aimed at gathering reports of AE experienced by the patient up to that point. |
| Caregiver's interview                                            | Structured or unstructured interview or questionnaire administered to caregivers directly providing care to the patient, in-person or remotely, aimed at gathering reports of AE experienced by the patient up to that point.  |
| Caregiver's self-report                                          | Instructions provided to the caregiver by the researcher or healthcare professional to report the occurrence of any AE.                                                                                                        |

**Table S4.** Quality assessment of cohort studies using the Newcastle-Ottawa Scale, organized by clinical condition.

| Study (Author, year)                            | Selection (0 to 4)                                |                                    |                           | Comparability (0 to 2)       |                                                           | Outcome (0 to 3)      |                                        |                                    | Total (0 to 9) | Quality score |
|-------------------------------------------------|---------------------------------------------------|------------------------------------|---------------------------|------------------------------|-----------------------------------------------------------|-----------------------|----------------------------------------|------------------------------------|----------------|---------------|
|                                                 | Representativeness of exposed cohort <sup>1</sup> | Selection of the nonexposed cohort | Ascertainment of exposure | Outcome not present at start | Comparability of basis of design or analysis <sup>2</sup> | Assessment of outcome | Adequate follow-up length <sup>3</sup> | Adequacy of follow-up <sup>4</sup> |                |               |
| <b>HIV</b>                                      |                                                   |                                    |                           |                              |                                                           |                       |                                        |                                    |                |               |
| Khalili H et al. (2009) <sup>1</sup>            | 1                                                 | 0                                  | 1                         | 1                            | 1                                                         | 0                     | 1                                      | 0                                  | 5              | Poor          |
| Modayil RR et al. (2010) <sup>2</sup>           | 1                                                 | 0                                  | 1                         | 1                            | 1                                                         | 1                     | 1                                      | 1                                  | 7              | Good          |
| Nagpal M et al. (2010) <sup>3</sup>             | 1                                                 | 0                                  | 1                         | 1                            | 0                                                         | 0                     | 1                                      | 1                                  | 5              | Poor          |
| Abaissa SG et al. (2012) <sup>4</sup>           | 1                                                 | 0                                  | 1                         | 1                            | 1                                                         | 1                     | 1                                      | 1                                  | 7              | Good          |
| Bernal F et al. (2013) <sup>5</sup>             | 1                                                 | 0                                  | 1                         | 1                            | 1                                                         | 1                     | 0                                      | 1                                  | 6              | Good          |
| Bezabhe WM et al. (2015) <sup>6</sup>           | 1                                                 | 0                                  | 1                         | 1                            | 2                                                         | 1                     | 1                                      | 1                                  | 8              | Good          |
| Jha AK et al. (2015) <sup>7</sup>               | 0                                                 | 0                                  | 1                         | 1                            | 0                                                         | 0                     | 1                                      | 1                                  | 4              | Poor          |
| Mann M et al. (2016) <sup>8</sup>               | 1                                                 | 0                                  | 1                         | 1                            | 1                                                         | 1                     | 1                                      | 1                                  | 7              | Good          |
| Gudina EK et al. (2017) <sup>9</sup>            | 1                                                 | 0                                  | 1                         | 1                            | 1                                                         | 1                     | 1                                      | 1                                  | 7              | Good          |
| Isa AM et al. (2018) <sup>10</sup>              | 1                                                 | 0                                  | 1                         | 1                            | 1                                                         | 1                     | 1                                      | 1                                  | 7              | Good          |
| Oumar AA et al. (2019) <sup>11</sup>            | 1                                                 | 0                                  | 1                         | 1                            | 0                                                         | 1                     | 1                                      | 1                                  | 6              | Poor          |
| Sarraf DP et al. (2020) <sup>12</sup>           | 1                                                 | 0                                  | 1                         | 1                            | 0                                                         | 1                     | 0                                      | 1                                  | 5              | Poor          |
| Omolo BO et al. (2020) <sup>13</sup>            | 1                                                 | 0                                  | 1                         | 1                            | 0                                                         | 0                     | 1                                      | 0                                  | 4              | Poor          |
| Ray S et al. (2023) <sup>14</sup>               | 1                                                 | 0                                  | 1                         | 1                            | 1                                                         | 1                     | 1                                      | 1                                  | 7              | Good          |
| Bonfanti P et al. (2000) <sup>15</sup>          | 1                                                 | 0                                  | 1                         | 1                            | 1                                                         | 0                     | 1                                      | 1                                  | 6              | Good          |
| Pujades-Rodríguez M et al. (2011) <sup>16</sup> | 1                                                 | 0                                  | 1                         | 1                            | 1                                                         | 1                     | 1                                      | 0                                  | 6              | Good          |
| Hongo H et al. (2021) <sup>17</sup>             | 1                                                 | 0                                  | 1                         | 1                            | 1                                                         | 1                     | 1                                      | 1                                  | 7              | Good          |
| Ann H et al. (2019) <sup>18</sup>               | 1                                                 | 0                                  | 1                         | 1                            | 2                                                         | 0                     | 1                                      | 1                                  | 7              | Good          |

|                                         |   |   |   |   |   |   |   |   |   |      |
|-----------------------------------------|---|---|---|---|---|---|---|---|---|------|
| Tukei VJ et al. (2012) <sup>19</sup>    | 1 | 0 | 1 | 1 | 1 | 1 | 1 | 1 | 7 | Good |
| Tetteh RA et al. (2015) <sup>20</sup>   | 1 | 0 | 1 | 0 | 1 | 1 | 1 | 0 | 5 | Fair |
| Joseph AC et al. (2016) <sup>21</sup>   | 1 | 0 | 1 | 1 | 0 | 1 | 1 | 1 | 6 | Poor |
| Jena A et al. (2009) <sup>22</sup>      | 1 | 0 | 1 | 1 | 1 | 1 | 1 | 1 | 7 | Good |
| Sharma A et al. (2008) <sup>23</sup>    | 0 | 0 | 1 | 1 | 0 | 1 | 1 | 0 | 4 | Poor |
| <b>Influenza</b>                        |   |   |   |   |   |   |   |   |   |      |
| Komeda T et al. (2014) <sup>24</sup>    | 1 | 0 | 1 | 1 | 0 | 0 | 1 | 1 | 5 | Poor |
| Komeda T et al. (2015) <sup>25</sup>    | 1 | 0 | 1 | 1 | 0 | 0 | 1 | 1 | 5 | Poor |
| Komeda T et al. (2016) <sup>26</sup>    | 1 | 0 | 1 | 1 | 0 | 0 | 1 | 1 | 5 | Poor |
| Kashiwagi S et al. (2012) <sup>27</sup> | 1 | 0 | 1 | 1 | 1 | 0 | 0 | 1 | 5 | Poor |
| Nakano T et al. (2021) <sup>28</sup>    | 1 | 0 | 1 | 1 | 1 | 0 | 0 | 1 | 5 | Poor |
| Dalvi PS et al. (2011) <sup>29</sup>    | 1 | 0 | 1 | 1 | 1 | 0 | 0 | 1 | 5 | Poor |
| Tahara T et al. (2013) <sup>30</sup>    | 1 | 1 | 1 | 1 | 2 | 0 | 1 | 1 | 8 | Good |
| Nakazawa M et al. (2020) <sup>31</sup>  | 1 | 0 | 1 | 1 | 0 | 0 | 0 | 1 | 4 | Poor |
| <b>HCV</b>                              |   |   |   |   |   |   |   |   |   |      |
| Tinë F et al. (2010) <sup>32</sup>      | 1 | 0 | 1 | 1 | 1 | 1 | 1 | 1 | 7 | Good |
| Suzuki F et al. (2018) <sup>33</sup>    | 1 | 0 | 1 | 1 | 0 | 1 | 1 | 1 | 6 | Poor |
| Ahmed E et al. (2018) <sup>34</sup>     | 1 | 0 | 1 | 1 | 1 | 1 | 1 | 1 | 7 | Good |
| Mizokami M et al. (2020) <sup>35</sup>  | 1 | 0 | 1 | 1 | 0 | 1 | 0 | 1 | 5 | Poor |
| <b>HBV</b>                              |   |   |   |   |   |   |   |   |   |      |
| Kim CW et al. (2018) <sup>36</sup>      | 1 | 0 | 1 | 1 | 1 | 1 | 1 | 1 | 7 | Good |

**HIV:** Human Immunodeficiency Virus; **HCV:** Hepatitis C Virus; **HBV:** Hepatitis B Virus

<sup>1</sup>The representativeness of the exposed cohort was deemed to be truly representative of the average population in the community with respect to relevant criteria (e.g., age, sex, diagnosis).

<sup>2</sup>The comparability of cohorts, based on the design or analysis, was considered with reference to whether they presented any sub-analysis or statistical adjustment for concomitant drugs or for medication adherence.

<sup>3</sup>The decision on whether the follow-up was long enough for outcomes to occur was based on the clinical judgement of the authors. Given the diverse range of antiviral agents used in our systematic review, establishing a consistent follow-up time is challenging. Therefore, we did not impose a specific cut-off for follow-up duration. Instead, we relied on the authors' clinical judgement, considering factors such as the individual's clinical condition, the specific antiviral agent or group of antivirals under study, and the study design, among other relevant considerations, to determine if the follow-up duration was sufficient for capturing the occurrence of adverse events.

<sup>4</sup>For the adequacy of follow-up of cohorts, we considered a proportion of 10% of missing outcome data as an acceptable threshold for assessing bias. This decision is based on the understanding that the occurrence of the outcome of interest is reasonably common in the context of adverse events associated with systemic antiviral medicines. While there is no consensus threshold described in the literature, with values typically ranging between 5% and 20%, our decision to adopt a 10% threshold is reinforced by the range of thresholds reported and the reasonably common nature of these events.

**Quality score:** *Good quality:* 3 or 4 points in the selection domain AND 1 or 2 points in the comparability domain AND 2 or 3 points in the outcome domain; *Fair quality:* 2 points in the selection domain AND 1 or 2 points in the comparability domain AND 2 or 3 points in the outcome/exposure domain; *Poor quality:* 0 or 1 point in the selection domain OR 0 points in the comparability domain OR 0 or 1 points in the outcome/exposure domain.



**Table S5.** Comprehensive overview of AE, severity and causality definitions, and active pharmacovigilance strategies employed in the included studies.

| Study<br>(Author,<br>year)            | AE, severity and causality definitions                                                                                                                                                                                                                                                                                                                                                                                                                                                                 | Active FV strategy    |                                                                                                                                       |                                                                                                                                                                                                                                                                                                                                                                                                                                                                                                                                                                                                                                                                                                                                                                                                                                                                                                                                     |
|---------------------------------------|--------------------------------------------------------------------------------------------------------------------------------------------------------------------------------------------------------------------------------------------------------------------------------------------------------------------------------------------------------------------------------------------------------------------------------------------------------------------------------------------------------|-----------------------|---------------------------------------------------------------------------------------------------------------------------------------|-------------------------------------------------------------------------------------------------------------------------------------------------------------------------------------------------------------------------------------------------------------------------------------------------------------------------------------------------------------------------------------------------------------------------------------------------------------------------------------------------------------------------------------------------------------------------------------------------------------------------------------------------------------------------------------------------------------------------------------------------------------------------------------------------------------------------------------------------------------------------------------------------------------------------------------|
|                                       |                                                                                                                                                                                                                                                                                                                                                                                                                                                                                                        | Type of<br>strategy   | Clinical data sources<br><i>Where the researcher/healthcare<br/>professional obtains the information<br/>for patient's assessment</i> | Strategy description                                                                                                                                                                                                                                                                                                                                                                                                                                                                                                                                                                                                                                                                                                                                                                                                                                                                                                                |
| <b>HIV</b>                            |                                                                                                                                                                                                                                                                                                                                                                                                                                                                                                        |                       |                                                                                                                                       |                                                                                                                                                                                                                                                                                                                                                                                                                                                                                                                                                                                                                                                                                                                                                                                                                                                                                                                                     |
| Khalili H et al. (2009) <sup>1</sup>  | <p><i>ADR:</i> any noxious or unintended response to a drug, which occurs at doses normally used in human for the prophylaxis, diagnosis or treatment of disease or for the modification of physiological function according to WHO).</p> <p><i>Severity:</i> based on AIDS Clinical Trials Group classifications, and Hartwig and Siegel.</p> <p><i>Causality:</i> was evaluated using the Roussel Uclaf Causality Assessment Method (RUCAM) algorithm and WHO criteria for causality assessment.</p> | Drug event monitoring | <p>Patient's interview</p> <p>Laboratory tests</p>                                                                                    | <p>Follow-up visits were usually carried out at least monthly by experienced physicians and clinical pharmacist who could ascertain the occurrence of ADRs. Patients were also asked to report any ADRs upon occurrence. Complete and differential blood counts (CBC/diff) assessment was repeated at each visit or upon indication based on patients symptoms. Follow-up lipid profile, FBS, liver and renal function tests, serum lactate and CPK levels were measured at months 3, 6, and 12 of treatment and as indicated. LFTs were done at weeks 2, 4, 8, and 12 of treatment in patients on nevirapine-based regimens. At the onset of any adverse reaction (whether it caused ART discontinuation or not), a special ADR form was filled containing the following data: description of the reaction, severity of the reaction, any necessary intervention, outcome, and causal relationship between drugs and reaction.</p> |
| Modayil RR et al. (2010) <sup>2</sup> | <p><i>Severity:</i> based on modified Hartwig and Siegel scale.</p> <p><i>Causality:</i> based on WHO ADR probability scale and Naranjo's algorithm.</p>                                                                                                                                                                                                                                                                                                                                               | Drug event monitoring | <p>Medical records</p> <p>Patient's interview</p>                                                                                     | <p>Patients were intensively monitored for any ADRs during follow-up visits to the ART centre. ADRs were identified by an interview with the patient and/or their attendants, as well as a review of out-patient case records, laboratory reports, clinician's notes and prescriptions at each follow-up visit.</p>                                                                                                                                                                                                                                                                                                                                                                                                                                                                                                                                                                                                                 |

|                                       |                                                                                                                                                                                                                                                                                                                |                       |                                                                                                                                                        |                                                                                                                                                                                                                                                                                                                                                                                                                                                                                                                                                                                                                                                                                                         |
|---------------------------------------|----------------------------------------------------------------------------------------------------------------------------------------------------------------------------------------------------------------------------------------------------------------------------------------------------------------|-----------------------|--------------------------------------------------------------------------------------------------------------------------------------------------------|---------------------------------------------------------------------------------------------------------------------------------------------------------------------------------------------------------------------------------------------------------------------------------------------------------------------------------------------------------------------------------------------------------------------------------------------------------------------------------------------------------------------------------------------------------------------------------------------------------------------------------------------------------------------------------------------------------|
| Nagpal M et al. (2010) <sup>3</sup>   | <p><i>ADR</i>: based on WHO criteria.</p> <p>Causality: <i>ADR</i>: based on WHO probability scale.</p>                                                                                                                                                                                                        | Drug event monitoring | <p>Medical records</p> <p>Patient's interview</p>                                                                                                      | <p>From the patients file, record was made of the findings of complete general physical, systemic examination and all laboratory investigations. <i>ADR</i> monitoring was done in a systematic manner adopting both spontaneous and intensive monitoring approaches. Patients were asked in detail about the duration of <i>AE</i>, its severity and any concomitant medication taken. At the same time, the patients were asked about common <i>ADRs</i> as mentioned in the literature. A diary card was also given to each patient for recording the adverse events which was checked at every visit.</p>                                                                                           |
| Abaissa SG et al. (2012) <sup>4</sup> | <p><i>AE</i>: based on the Ministry of Health Guidelines for use of antiretroviral drugs in Ethiopia, Addis Ababa, 2008, and the AIDS Clinical Trial Group (ACTG) toxicity grading system.</p> <p><i>Severity</i>: classified as grade III and IV according to AIDS Clinical Trials Group classifications.</p> | Drug event monitoring | <p>Patient's interview</p> <p>Laboratory tests</p>                                                                                                     | <p>Patients were recruited from the HIV outpatient clinics. Data were collected by trained physicians using a structured questionnaire, which included sociodemographic information, and clinical and laboratory findings. The patients were prospectively followed at baseline, 2 weeks, 4 weeks, 8 weeks, 12 weeks and 18 weeks after ART initiation, or as required when patients developed serious <i>AE</i>. Clinical evaluation was performed at entry and at each subsequent visit. Haematological and biochemical tests were performed at baseline/entry (just prior to ART commencement), at 4 weekly scheduled visits after the patient was started on ART and when clinically indicated.</p> |
| Bernal F et al. (2013) <sup>5</sup>   | <p><i>AE</i>: Chile Ministry of Health in its HIV/AIDS clinical guide, 2009.</p>                                                                                                                                                                                                                               | Drug event monitoring | <p>Patient's interview</p> <p>Laboratory tests</p>                                                                                                     | <p>The program consists of a weekly control during the first month of treatment. During each visit, <i>ADR</i> were registered and notified to the National Center for Information on Medicines and Pharmacovigilance (CENIMEF). For the detection of laboratory alterations, metabolic tests were requested, prior to medical control.</p>                                                                                                                                                                                                                                                                                                                                                             |
| Bezabhe WM et al. (2015) <sup>6</sup> | <p><i>ADR</i>: WHO definition.</p> <p><i>Severity AE</i>: based on the National Institutes of Health, National Institute of Allergy and Infectious Diseases (NIAID), Division of AIDS (DAIDS) Table for Grading the Severity of Adult and Pediatric Adverse Events.</p>                                        | Drug event monitoring | <p>Patients' self-report</p> <p>Healthcare professionals' interview</p> <p>Caregivers' interview</p> <p>Patients' interview</p> <p>Medical records</p> | <p>A research pharmacist was assigned to each hospital's ART clinic to assess <i>ADRs</i> throughout the study period. Patients were also asked to report any potential <i>ADRs</i>. <i>ADRs</i> that continued for subsequent appointments without recovery were reported once. The research pharmacists interviewed patients, caregivers and physicians, reviewed patients' medical records and documented detailed information for each of the potential <i>ADRs</i> that patients experienced.</p>                                                                                                                                                                                                  |
| Jha AK et al. (2015) <sup>7</sup>     | NR                                                                                                                                                                                                                                                                                                             | Drug event monitoring | Patient's interview                                                                                                                                    | <p>After initiation of the therapy, the patients were examined for any <i>AE</i> that occurred, its type and severity, or any other abnormal laboratory finding. These subjects were followed up for a period of two months. At each follow-up visit, the adverse clinical events and the abnormal laboratory findings were documented. The case sheets of the included subjects were studied and the information obtained was entered into the Suspected Adverse Event</p>                                                                                                                                                                                                                             |

|                                      |                                                                                                                                                                                                                                                                |                       |                                                            |                                                                                                                                                                                                                                                                                                                                                                                                                                                                                                                                                                                                                                                                                                                                                                                                                                                   |
|--------------------------------------|----------------------------------------------------------------------------------------------------------------------------------------------------------------------------------------------------------------------------------------------------------------|-----------------------|------------------------------------------------------------|---------------------------------------------------------------------------------------------------------------------------------------------------------------------------------------------------------------------------------------------------------------------------------------------------------------------------------------------------------------------------------------------------------------------------------------------------------------------------------------------------------------------------------------------------------------------------------------------------------------------------------------------------------------------------------------------------------------------------------------------------------------------------------------------------------------------------------------------------|
| Mann M et al. (2016) <sup>8</sup>    | NR                                                                                                                                                                                                                                                             | Sentinel sites        | Medical records<br>Patient's interview                     | Reporting Form. The subjects were not interviewed by the investigator. When any other information was required, the treating physician was contacted. Any AE observed by the investigator or treating physician was noted in the form and any untoward event was labeled as an AE only after the concurrence of treating physician.                                                                                                                                                                                                                                                                                                                                                                                                                                                                                                               |
| Gudina EK et al. (2017) <sup>9</sup> | <i>ADR:</i> based on WHO criteria; only clinical conditions known to arise from potential agent, in the absence of other compelling medical conditions, were attributable to ADR.<br><br><i>Severity:</i> based on grade III and IV according to WHO criteria. | Drug event monitoring | Medical records<br>Laboratory tests<br>Patient's interview | Baseline data collected from participants included socio-demographic profile, general medical conditions, laboratory parameters and components of HIV care given to them (ART regimen, treatment for OI and prophylaxis given). Participants were subsequently followed from baseline for occurrence of ADR related to ART using clinical parameters and laboratory data where applicable. A particular emphasis was given to the first 6 months after ART initiation as most of the toxicities tend to occur during this time. These data were obtained from medical records for patients who were started on ART before 2009 (before recruitment started). Patients were assessed on each visit using checklists prepared for routine follow-up evaluation. In patients with suspected ADR, all necessary laboratory tests were done as needed. |
| Isa AM et al. (2018) <sup>10</sup>   | <i>AE:</i> All events that occurred during this period.<br><br><i>ADR:</i> based on WHO criteria.                                                                                                                                                              | Drug event monitoring | Medical records<br>Patient's interview                     | ADR monitoring was carried out using spontaneous reporting by patients and by active surveillance in the form of targeted spontaneous reporting by the primary investigator in conjunction with the ART clinician, ART focal pharmacist and the adherence counsellor. Data were collected using patient interviews (conducted between 8:00 am and 2:00 pm during clinic days), medical records and follow-up. Other relevant information, such as                                                                                                                                                                                                                                                                                                                                                                                                 |

|                                       |                                                                                                                                                   |                       |                                                                |  |                                                                                                                                                                                                                                                                                                                                                                                                                                                                                                                                                                                                     |
|---------------------------------------|---------------------------------------------------------------------------------------------------------------------------------------------------|-----------------------|----------------------------------------------------------------|--|-----------------------------------------------------------------------------------------------------------------------------------------------------------------------------------------------------------------------------------------------------------------------------------------------------------------------------------------------------------------------------------------------------------------------------------------------------------------------------------------------------------------------------------------------------------------------------------------------------|
|                                       | <i>Severity:</i> based on Hartwig severity assessment scale.                                                                                      |                       |                                                                |  | current ART regimen and patient medical and medication history were extracted from the patients' medical folder. Patients were asked to describe any ADRs they experienced from their ART, and whether the ADRs they experienced had made them skip or stop taking their medications. Data were collected using the data collection form, which had been developed from a survey of literature and pilot tested before commencement of the study. Follow-up was carried out for a period of 6 months, with an interval of 1 month for new patients and 2 months for patients on refill appointment. |
| Oumar AA et al. (2019) <sup>11</sup>  | <i>Causality:</i> based on Naranjo's algorithm.                                                                                                   | Drug event monitoring | Medical records<br>Patient's interview                         |  | Each patient was interviewed and their medical charts were reviewed at each follow-up visit for any signs of ADR. A senior clinical pharmacist assessed and discussed any suspected or documented ADR with the physicians' team.                                                                                                                                                                                                                                                                                                                                                                    |
| Sarraf DP et al. (2020) <sup>12</sup> | <i>ADR:</i> defined as any response to a medicine which is noxious and unintended, and which occurs at doses normally used in patients.           | Drug event monitoring | Medical records<br>Patient's interview<br>Physical examination |  | A semi-structured proforma was prepared using the relevant literatures to collect the data. The patient were followed up on monthly basis when they visited the ART clinic for refilling of the prescription. Face-to-face interview was carried out using the questionnaire and general physical and systemic examinations were performed to identify ADRs. Hospital records and laboratory reports, clinician's notes and prescriptions were also reviewed for relevant data.                                                                                                                     |
| Omolo BO et al. (2020) <sup>13</sup>  | <i>AE:</i> based on WHO ART guidelines.                                                                                                           | Drug event monitoring | Patients' interview                                            |  | Data were recorded during each patient's monthly visit, and included demographic characteristics (sex, race, and age), pain information, TB status, drug regimen and clinical evaluation variables. Also, information on the adverse events and complications of HIV and ART at each study visit was recorded.                                                                                                                                                                                                                                                                                      |
| Ray S et al. (2023) <sup>14</sup>     | <i>Causality:</i> based on WHO ADR probability scale and Naranjo's algorithm.<br><br><i>Severity:</i> based on modified Hartwig and Siegel scale. | Drug event monitoring | Patient's interview<br>Patients' self-report                   |  | During the first 6 months after ART initiation, occurrence of any new event in the patients was actively enquired during each visit and evaluated for possible ADR. In addition, patients were encouraged to make a telephonic call or return to the center in case of development of any new symptom even when the scheduled visit was not due.                                                                                                                                                                                                                                                    |

|                                                 |                                                                                                                                                                                                                                                                                                                                                                                                                                                                                                            |                       |                                                                                 |                                                                                                                                                                                                                                                                                                                                                                                                                                                                                                                                                                                                                                                     |
|-------------------------------------------------|------------------------------------------------------------------------------------------------------------------------------------------------------------------------------------------------------------------------------------------------------------------------------------------------------------------------------------------------------------------------------------------------------------------------------------------------------------------------------------------------------------|-----------------------|---------------------------------------------------------------------------------|-----------------------------------------------------------------------------------------------------------------------------------------------------------------------------------------------------------------------------------------------------------------------------------------------------------------------------------------------------------------------------------------------------------------------------------------------------------------------------------------------------------------------------------------------------------------------------------------------------------------------------------------------------|
| Bonfanti P et al. (2000) <sup>15</sup>          | <p><i>AE</i>: any response to the combination therapy that is either harmful or unwanted and that results from normal therapeutic dosage; lack of therapeutic success is excluded from this definition, as re poisoning (whether intentional or accidental) and overdose).</p> <p><i>Severity</i>: based on the NIH, NIAID, DAIDS Table for Grading the Severity of Adult and Pediatric Adverse Events.</p> <p><i>Causality</i>: based on Roussel Uclaf Causality Assessment Method (RUCAM) algorithm.</p> | Drug event monitoring | <p>Patient's interview</p> <p>Patients' self-report</p> <p>Laboratory tests</p> | <p>Follow-up visits are carried out by each individual center at varying times, but at least every 2 months, by experienced physicians who can readily ascertain the occurrence of AE. Blood tests are performed during such visits. Patients are also asked to report any serious AE when they occur. At the onset of any AE (whether it causes treatment discontinuation or not), a special card is filled containing the following data: description of the reaction, seriousness of the reaction, outcome, concomitant treatment, and causal relationship between drugs and reaction).</p>                                                      |
| Pujades-Rodríguez M et al. (2011) <sup>16</sup> | <p><i>Severity</i>: based on grading scale from the Division of AIDS, National Institute of Allergy and Infectious Diseases, version 1.0 December 2004.</p>                                                                                                                                                                                                                                                                                                                                                | Registry              | Patient's interview                                                             | <p>At each consultation or hospitalization individual patient data were prospectively collected using standardized forms and entered into FUCHIA.</p>                                                                                                                                                                                                                                                                                                                                                                                                                                                                                               |
| Hongo H et al. (2021) <sup>17</sup>             | <p><i>ADR</i>: as AE suspected to be related to DTG evaluated by the reporting physician and the sponsor.</p> <p><i>Severity</i>: evaluated by the sponsor.</p>                                                                                                                                                                                                                                                                                                                                            | Drug event monitoring | Patient's interview                                                             | <p>A standardized survey form was used to collect demographic, safety, and effectiveness domestic data. Specific AE as well as their dates of onset, clinical course, treatment, seriousness, outcome, causal relationship to disease or drugs, and presence or absence of abnormal changes in laboratory values (if measured) were collected.</p>                                                                                                                                                                                                                                                                                                  |
| Ann H et al. (2019) <sup>18</sup>               | <p><i>AE, ADR and severity</i>: based on WHO-ART 092 (Korea Institute of Drug Safety &amp; Risk Management).</p>                                                                                                                                                                                                                                                                                                                                                                                           | Drug event monitoring | Patient's interview                                                             | <p>Each physician decided patient visit schedules based on their routine practices. At the initial visit, demographic information, medical history, concomitant medications, laboratory values including viral load, CD4+ cell counts (if any) were recorded. Because of the non-interventional design of the study, not all the subjects had their HIV-1 RNA viral load and CD4+ T cell counts every visit. Any results of HIV RNA viral load and CD4+T cell counts as a part of standard of care within the study period were collected for analysis. Physicians were guided to record any treatment-emergent AE during the follow up visits.</p> |

|                                       |                                                                                                                                                                                                                                                                                                                                                                                                                             |                       |                                                                                                  |                                                                                                                                                                                                                                                                                                                                                                                                                                                                                                                                                                                                                                                                                                                                                                                                                                                                                                                                                 |
|---------------------------------------|-----------------------------------------------------------------------------------------------------------------------------------------------------------------------------------------------------------------------------------------------------------------------------------------------------------------------------------------------------------------------------------------------------------------------------|-----------------------|--------------------------------------------------------------------------------------------------|-------------------------------------------------------------------------------------------------------------------------------------------------------------------------------------------------------------------------------------------------------------------------------------------------------------------------------------------------------------------------------------------------------------------------------------------------------------------------------------------------------------------------------------------------------------------------------------------------------------------------------------------------------------------------------------------------------------------------------------------------------------------------------------------------------------------------------------------------------------------------------------------------------------------------------------------------|
| Tukei VJ et al. (2012) <sup>19</sup>  | <p><i>AE/ADR</i>: defined as a physician-documented occurrence or worsening of any undesirable symptom or sign (including an abnormal laboratory finding) temporally associated with the use of ARV drugs.</p> <p><i>Severity</i>: based on US National Institute of Allergy and Infectious Diseases Division of AIDS Table for Grading the Severity of Adult and Pediatric Adverse Events (grading table) Version 1.0.</p> | Drug event monitoring | <p>Patient's interview</p> <p>Laboratory tests</p>                                               | <p>At every visit, clinical information on probable or confirmed adverse events was recorded in the patient's chart and appropriate laboratory investigations were carried out. Patients starting ART were scheduled to return to the clinic 2, 4, and 8 weeks after starting ART. Thereafter, routine monthly follow-up at the clinic involved drug refills, assessment for adverse events, and assessment of adherence to medication. In addition, patients were encouraged to return to the clinic any time they developed symptoms of disease or probable drug toxicity. At each visit, a structured questionnaire designed to capture possible adverse events was filled by the physicians.</p>                                                                                                                                                                                                                                            |
| Tetteh RA et al. (2015) <sup>20</sup> | NR                                                                                                                                                                                                                                                                                                                                                                                                                          | Drug event monitoring | <p>Patient's interview</p> <p>Healthcare professionals' interview</p>                            | <p>Active follow-up for adverse events and adherence to prophylaxis schedule were performed by trained research assistants through telephone contact on days 3 and 10 after drug dispensing for those on the 3-day schedule and on days 3, 10, 20, 28 and 35 after drug dispensing for those on the 28 days schedule. In addition to the active follow-up, exposed HCWs/HCSs were asked to report events of medical concern (literally "anything that worries you") at any time during the follow-up period, noting especially the following signs; fever, rash, lymphadenopathy, dark-coloured urine, sore throat and bruising or bleeding from any part of the body. A structured questionnaire, interview guide was used to collect data from exposed HCWs/HCSs. Event data on adverse events was first recorded according to how the patient described the event (verbatim) and then reviewed qualitatively and coded using the MedDRA.</p> |
| Joseph AC et al. (2016) <sup>21</sup> | <p><i>Severity</i>: based on modified Hartwig and Seigel criteria.</p> <p><i>Causality</i>: based on WHO causality scale and Naranjo's algorithm.</p>                                                                                                                                                                                                                                                                       | Drug event monitoring | <p>Patient's interview</p> <p>Physical examination</p> <p>Laboratory tests</p> <p>Other CDTP</p> | <p>Information regarding patients were obtained using a structured proforma.</p> <p>Physical findings and the investigations including complete blood count, liver function test, renal function test, random blood sugar, lipid profile, urine routine examination, serum calcium and phosphate estimation were recorded before starting the treatment and at 4 months, 8 months and 12 months. Ultrasonogram of abdomen was done at the initiation of treatment 6 and 12 months and in case of any specific reason/need in between. The patients were followed up at 2 months interval for clinical examination and the details of adverse events, if any occurred during this period were also recorded in the proforma. The data regarding the presence and absence of subjective side effects were obtained by asking leading questions to the patients or the accompanying person.</p>                                                    |

|                                      |    |                       |                                                                               |                                                                                                                                                                                                                                                                                                                                                                                                                                                                                                                |
|--------------------------------------|----|-----------------------|-------------------------------------------------------------------------------|----------------------------------------------------------------------------------------------------------------------------------------------------------------------------------------------------------------------------------------------------------------------------------------------------------------------------------------------------------------------------------------------------------------------------------------------------------------------------------------------------------------|
| Jena A et al. (2009) <sup>22</sup>   | NR | Drug event monitoring | Physical examination<br>Laboratory tests<br>Other CDTP<br>Patient's interview | A detailed medical history was obtained and general physical examination was performed. Baseline investigations in the form of hemogram, liver function test (LFT), renal function test, lipidogram, electrocardiogram (ECG), and chest x-ray were obtained. The study group was followed up prospectively for 6 months. At 2, 6, 14, and 24 weeks, a questionnaire containing adverse effects of ARV medications was recorded. The occurrence of new symptoms was noted and relations to drugs were analyzed. |
| Sharma A et al. (2008) <sup>23</sup> | NR | Drug event monitoring | Patient's self-report<br>Physical examination                                 | All patients were asked to visit the clinic if they developed any symptoms or on a monthly basis. They were screened clinically and investigated suitably for any ADRs.                                                                                                                                                                                                                                                                                                                                        |

## Influenza

|                                      |                                                                                                                                                                                                                                                                                                                                                                                               |                       |                                              |                                                                                                                                                                                                                                                                                                                                                                                                                                                                                                                                                                                                                                                                                                                                                                                                                                                               |
|--------------------------------------|-----------------------------------------------------------------------------------------------------------------------------------------------------------------------------------------------------------------------------------------------------------------------------------------------------------------------------------------------------------------------------------------------|-----------------------|----------------------------------------------|---------------------------------------------------------------------------------------------------------------------------------------------------------------------------------------------------------------------------------------------------------------------------------------------------------------------------------------------------------------------------------------------------------------------------------------------------------------------------------------------------------------------------------------------------------------------------------------------------------------------------------------------------------------------------------------------------------------------------------------------------------------------------------------------------------------------------------------------------------------|
| Komeda T et al. (2014) <sup>24</sup> | <p><i>AE</i>: defined all untoward or unintended signs (including abnormal laboratory test results), symptoms, or diseases occurring following peramivir administration, regardless of the causality.</p> <p><i>ADR</i>: defined as AE whose causality to peramivir could not be ruled out, i.e., those other than “unrelated,” as determined by the participating physicians or sponsor.</p> | Drug event monitoring | Patient's interview                          | This study was implemented in a continuous investigation system, wherein the participating physicians were instructed to continuously complete survey forms. They provided a peramivir safety and effectiveness check sheet to patients under treatment and requested to complete it. The participating patients completed the check sheet with regard to details such as time course of symptoms and daily maximum body temperature, and returned the sheet at the next hospital visit or posted it to the physician. The physicians completed the survey forms, including the items related to AE, by referring to the check sheets for all patients promptly after completing the observation period, including for those who did not provide adequate safety information because of failure to revisit after the first time or to submit the check sheet. |
| Komeda T et al. (2015) <sup>25</sup> | <p><i>AE</i>: defined as all untoward or unintended signs (including abnormal laboratory test results), symptoms, or diseases occurring following peramivir administration, regardless of the causality.</p>                                                                                                                                                                                  | Drug event monitoring | Patient's interview<br>Caregiver's interview | This study was implemented in a continuous investigation system, wherein the participating physicians were instructed to continuously complete survey forms. They provided a peramivir safety and effectiveness check sheet to patients or their guardians under treatment and requested to complete it. The participating patients completed the check sheet with regard to details such as time course of symptoms and daily maximum body temperature, and returned the sheet at the next hospital visit or posted it to the physician. The physicians completed the survey forms, including the items related to AE,                                                                                                                                                                                                                                       |

|                                               |                                                                                                                                                                                                                                                                                                                                                                                                  |                              |                                                      |                                                                                                                                                                                                                                                                                                                                                                                                                                                                                                                                                                                                                                                                                                                                              |
|-----------------------------------------------|--------------------------------------------------------------------------------------------------------------------------------------------------------------------------------------------------------------------------------------------------------------------------------------------------------------------------------------------------------------------------------------------------|------------------------------|------------------------------------------------------|----------------------------------------------------------------------------------------------------------------------------------------------------------------------------------------------------------------------------------------------------------------------------------------------------------------------------------------------------------------------------------------------------------------------------------------------------------------------------------------------------------------------------------------------------------------------------------------------------------------------------------------------------------------------------------------------------------------------------------------------|
|                                               | <p><i>ADR</i>: defined as AE whose causality to peramivir could not be ruled out, i.e., those other than “unrelated,” as determined by the participating physicians or sponsor.</p>                                                                                                                                                                                                              |                              |                                                      | <p>by referring to the check sheets for all patients promptly after completing the observation period, including for those who did not provide adequate safety information because of failure to revisit after the first time or to submit the check sheet.</p>                                                                                                                                                                                                                                                                                                                                                                                                                                                                              |
| <p>Komeda T et al. (2016)<sup>26</sup></p>    | <p><i>AE</i>: defined as all untoward or unintended signs (including abnormal laboratory test results), symptoms, or diseases occurring following peramivir administration, regardless of the causality.</p> <p><i>ADR</i>: defined as AE whose causality to peramivir could not be ruled out, i.e., those other than “unrelated,” as determined by the participating physicians or sponsor.</p> | <p>Drug event monitoring</p> | <p>Patient's interview</p>                           | <p>This study was implemented in a continuous investigation system, wherein the participating physicians were instructed to continuously complete survey forms. The physicians completed the survey forms, including baseline characteristics of the inpatients and the items related to AE. The physicians completed the survey forms, including baseline characteristics of the patients and the items related to adverse events (AEs) and effectiveness.</p>                                                                                                                                                                                                                                                                              |
| <p>Kashiwagi S et al. (2012)<sup>27</sup></p> | <p><i>AE</i>: medically untoward events emerging following administration of laninamivir.</p> <p><i>Causality</i>: AE that were clearly or likely to be causally related to the study drug were defined as ADR.</p>                                                                                                                                                                              | <p>Drug event monitoring</p> | <p>Patient's self-report<br/>Patient's interview</p> | <p>The participating physician asked each relevant patient to perform the following study activities to evaluate the safety of laninamivir: contact the participating physician to give details if any unfavourable symptom occurred within 15 days of inhalation of laninamivir; in the event of unfavourable symptoms, document the AE in a patient diary, including the date and time of onset, condition of the patient at onset (while sleeping, just after awakening, while awake), duration of the symptoms, body temperature at the onset of symptoms, and whether an antipyretic was used within 4 h before the onset of symptoms. Then either send the patient diary by mail or bring it in person to the attending physician.</p> |
| <p>Nakano T et al. (2021)<sup>28</sup></p>    | <p><i>AE</i>: medically untoward events emerging following administration of laninamivir.</p> <p><i>ADR</i>: that were clearly or likely to be causally related to the study drug.</p>                                                                                                                                                                                                           | <p>Drug event monitoring</p> | <p>Caregiver's self-report</p>                       | <p>Investigators asked the legal representative of a subject to record any unfavorable symptoms newly develop within 15 days of inhalation of the study drug.</p>                                                                                                                                                                                                                                                                                                                                                                                                                                                                                                                                                                            |



|                                        |                                                                                                                                                           |                       |                                                  |                                                                                                                                                                                                                                                                                                                                                                                                                                                                                                                                                                                                                                                                                                                                                                                                                                                                                                                                               |
|----------------------------------------|-----------------------------------------------------------------------------------------------------------------------------------------------------------|-----------------------|--------------------------------------------------|-----------------------------------------------------------------------------------------------------------------------------------------------------------------------------------------------------------------------------------------------------------------------------------------------------------------------------------------------------------------------------------------------------------------------------------------------------------------------------------------------------------------------------------------------------------------------------------------------------------------------------------------------------------------------------------------------------------------------------------------------------------------------------------------------------------------------------------------------------------------------------------------------------------------------------------------------|
| Dalvi PS et al. (2011) <sup>29</sup>   | <i>Severity</i> : based on modified Hartwig and Seigel criteria.                                                                                          | Drug event monitoring | Caregiver's interview<br>Caregiver's self-report | The children were followed up for adverse events for a period of 10 days after receiving first dose of oseltamivir. The parents or guardians of children were asked to note development of new symptoms or worsening of existing symptoms in children and to report it to the hospital if necessary, during the study period. Monitoring for adverse events to oseltamivir was done by direct questioning for symptoms and clinical examination on day 5 and day 10. Assessment of neurological adverse events included questions to parents or guardians and children (>5 years). Parents were also encouraged to report such symptoms developed after the study period and within 30 days of receiving first dose of oseltamivir.                                                                                                                                                                                                           |
| Tahara T et al. (2013) <sup>30</sup>   | The child's pediatrician was then to decide whether each symptom was an AE or ADR on the basis of details in the returned "Symptom Observation Form".     | Drug event monitoring | Physical examination<br>Caregiver's self-report  | Gender, age, body weight, vaccination status, body temperature, virus type (result of antigen detection kit test), and date and time of fever or symptom onset were recorded at the first clinic or hospital visit. During the first week, guardians or family members were to record their child's body temperature every morning and evening, the severity of influenza symptoms such as nasal symptoms and cough, and any other symptoms of concern. Thereafter, they were to record body temperature once a week and any symptoms of concern. The child's pediatrician was then to decide whether each symptom was an AE or ADR on the basis of details in the returned "Symptom Observation Form", and to enter the relevant data in the patient's case report form. If a "Symptom Observation Form" was not returned, the pediatrician checked for occurrences of AEs by contacting the child's guardian or family member by telephone. |
| Nakazawa M et al. (2020) <sup>31</sup> | <i>ADR</i> : defined as AE whose causality to baloxavir could not be ruled out (i.e., other than "unrelated"), as determined by the physician or sponsor. | Drug event monitoring | Patient's self-report                            | Treating physicians provided a questionnaire to enrolled patients on the day of baloxavir treatment. Patients completed the questionnaire and returned it to the treating physician by mail. Treating physicians filled out the study forms on the basis of patient answers. AEs were collected using the patient questionnaire. Physicians then reported the name of the AE, date of onset, outcome (recovered, recovering, not recovered, recovered but with sequelae, death due to an AE, unknown), date of outcome, seriousness (serious, non-serious), and causal relationship to baloxavir.                                                                                                                                                                                                                                                                                                                                             |
| <b>HBC</b>                             |                                                                                                                                                           |                       |                                                  |                                                                                                                                                                                                                                                                                                                                                                                                                                                                                                                                                                                                                                                                                                                                                                                                                                                                                                                                               |
| Tinë F et al. (2010) <sup>32</sup>     | <i>Severity</i> : graded by the investigators as mild, moderate, severe or lifethreatening, based on modified WHO grading system.                         | Drug event monitoring | Patient's interview                              | Data collected included adverse event description, onset date, duration, intensity, relationship to study drugs and required treatment (if any). Data were registered at each visit during follow-up, together with the physician's decision on any modification to the dose schedule in order to continue or immediately discontinue therapy.                                                                                                                                                                                                                                                                                                                                                                                                                                                                                                                                                                                                |

On-treatment visits were performed at discrete times, that is at 15, 30, 60, 90 days from start, and then every 30 days up to the end of scheduled treatment. After the end of treatment, a visit was performed at 90 days and the final visit at 180 days.

|                                        |                                                                                    |                       |                                                                 |                                                                                                                                                                                                                                                                                                                                                                                                                                                                                                                      |
|----------------------------------------|------------------------------------------------------------------------------------|-----------------------|-----------------------------------------------------------------|----------------------------------------------------------------------------------------------------------------------------------------------------------------------------------------------------------------------------------------------------------------------------------------------------------------------------------------------------------------------------------------------------------------------------------------------------------------------------------------------------------------------|
| Suzuki F et al. (2018) <sup>33</sup>   | <i>ADR</i> : all AE other than those that were “not related” to drugs under study. | Sentinel sites        | Patient's interview                                             | Assessment data of postmarketing surveillance participants were obtained from case report forms (CRFs) at the participating sites.                                                                                                                                                                                                                                                                                                                                                                                   |
| Ahmed E et al. (2018) <sup>34</sup>    | <i>AE and severity</i> : based on FDA regulation.                                  | Drug event monitoring | Patient's interview<br>Patients self-report<br>Laboratory tests | Data was collected by the researchers using a structured interview questionnaire. Patients receiving DAAs were evaluated for AE every month through a detailed interview on the basis of preformed questionnaire. Follow up laboratory tests were done every month throughout the treatment period and at the end of treatment All patients were invited to report any changes in their health status or wellbeing during the treatment period.                                                                      |
| Mizokami M et al. (2020) <sup>35</sup> | NR                                                                                 | Sentinel sites        | Medical records<br>Patient's interview                          | Data were collected using standardized electronic case report forms (eCRFs) from patients' medical records at the clinical sites on demographics, medical history, prescribed medications, laboratory measures and treatment-emergent AEs. All treatment-emergent AEs were identified by treating physicians during routine clinical practice and reported using the standardized eCRFs, which collected detailed descriptions of the AEs, including seriousness and assessment of causal relationship to treatment. |

### HBV

|                                    |                                                                      |                       |                       |                                                                                                                                                   |
|------------------------------------|----------------------------------------------------------------------|-----------------------|-----------------------|---------------------------------------------------------------------------------------------------------------------------------------------------|
| Kim CW et al. (2018) <sup>36</sup> | <i>AE</i> : based on 2010 WHO Adverse Reaction Terminology criteria. | Drug event monitoring | Patient's self-report | Investigators recorded the patient demographics, disease information, drug administration reports, patient-reported AEs, and clinical laboratory. |
|------------------------------------|----------------------------------------------------------------------|-----------------------|-----------------------|---------------------------------------------------------------------------------------------------------------------------------------------------|

NR: Not Reported; HIV: Human Immunodeficiency Virus; HCV: Hepatitis C Virus; HBV: Hepatitis B Virus

Figure S1. Global traffic-light plot for risk of bias based on NOS scale.

| Study (Author, year)              | Risk of bias |    |    |    |    |    |    |    | Overall |
|-----------------------------------|--------------|----|----|----|----|----|----|----|---------|
|                                   | D1           | D2 | D3 | D4 | D5 | D6 | D7 | D8 |         |
| Khalili H et al. (2009)           | +            | X  | +  | +  | +  | X  | +  | X  | X       |
| Modayil RR et al. (2010)          | +            | X  | +  | +  | +  | +  | +  | +  | +       |
| Nagpal M et al. (2010)            | +            | X  | +  | +  | X  | X  | +  | +  | X       |
| Abaissa SG et al. (2012)          | +            | X  | +  | +  | +  | +  | +  | +  | +       |
| Bernal F et al. (2013)            | +            | X  | +  | +  | +  | +  | X  | +  | +       |
| Bezabhe WM et al. (2015)          | +            | X  | +  | +  | +  | +  | +  | +  | +       |
| Jha AK et al. (2015)              | X            | X  | +  | +  | X  | X  | +  | +  | X       |
| Mann M et al. (2016)              | +            | X  | +  | +  | +  | +  | +  | +  | +       |
| Gudina EK et al. (2017)           | +            | X  | +  | +  | +  | +  | +  | +  | +       |
| Isa AM et al. (2018)              | +            | X  | +  | +  | +  | +  | +  | +  | +       |
| Oumar AA et al. (2019)            | +            | X  | +  | +  | X  | +  | +  | +  | X       |
| Sarraf DP et al. (2020)           | +            | X  | +  | +  | X  | +  | X  | +  | X       |
| Omolo BO et al. (2020)            | +            | X  | +  | +  | X  | X  | +  | X  | X       |
| Ray S et al. (2023)               | +            | X  | +  | +  | +  | +  | +  | +  | +       |
| Bonfanti P et al. (2000)          | +            | X  | +  | +  | +  | X  | +  | +  | +       |
| Pujades-Rodríguez M et al. (2011) | +            | X  | +  | +  | +  | +  | +  | X  | +       |
| Hongo H et al. (2021)             | +            | X  | +  | +  | +  | +  | +  | +  | +       |
| Ann H et al. (2019)               | +            | X  | +  | +  | +  | X  | +  | +  | +       |
| Tukei VJ et al. (2012)            | +            | X  | +  | +  | +  | +  | +  | +  | +       |
| Tetteh RA et al. (2015)           | +            | X  | +  | X  | +  | +  | +  | X  | -       |
| Joseph AC et al. (2016)           | +            | X  | +  | +  | X  | +  | +  | +  | X       |
| Jena A et al. (2009)              | +            | X  | +  | +  | +  | +  | +  | +  | +       |
| Sharma A et al. (2008)            | X            | X  | +  | +  | X  | +  | +  | X  | X       |
| Komeda T et al. (2014)            | +            | X  | +  | +  | X  | X  | +  | +  | X       |
| Komeda T et al. (2015)            | +            | X  | +  | +  | X  | X  | +  | +  | X       |
| Komeda T et al. (2016)            | +            | X  | +  | +  | X  | X  | +  | +  | X       |
| Kashiwagi S et al. (2012)         | +            | X  | +  | +  | +  | X  | X  | +  | X       |
| Nakano T et al. (2021)            | +            | X  | +  | +  | +  | X  | X  | +  | X       |
| Dalvi PS et al. (2011)            | +            | X  | +  | +  | +  | X  | X  | +  | X       |
| Tahara T et al. (2013)            | +            | +  | +  | +  | +  | X  | +  | +  | +       |
| Nakazawa M et al. (2020)          | +            | X  | +  | +  | X  | X  | X  | +  | X       |
| Tinë F et al. (2010)              | +            | X  | +  | +  | +  | +  | +  | +  | +       |
| Suzuki F et al. (2018)            | +            | X  | +  | +  | X  | +  | +  | +  | X       |
| Ahmed E et al. (2018)             | +            | X  | +  | +  | +  | +  | +  | +  | +       |
| Mizokami M et al. (2020)          | +            | X  | +  | +  | X  | +  | X  | +  | X       |
| Kim CW et al. (2018)              | +            | X  | +  | +  | +  | +  | +  | +  | +       |

D1: Representativeness of exposed cohort  
 D2: Selection of the nonexposed cohort  
 D3: Ascertainment exposure  
 D4: Outcome not present at start  
 D5: Comparability of bases of design or analysis  
 D6: Assessment of outcome  
 D7: Adequate follow-up length  
 D8: Adequacy of follow-up of cohorts

Judgement  
 X Poor  
 - Unclear  
 + Good

**Figure S2.** Stacked bar chart of the number of articles by active pharmacovigilance strategy based on the number of clinical data sources used.

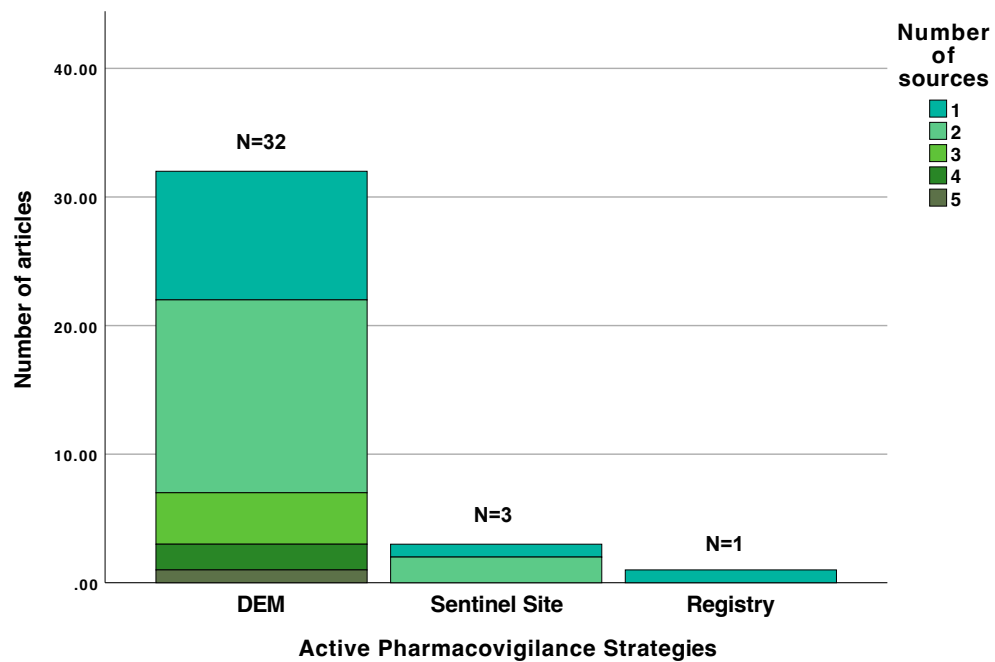

## REFERENCES

1. Khalili H, Dashti-Khavidaki S, Mohraz M, Etghani A, Almasi F. Antiretroviral induced adverse drug reactions in Iranian human immunodeficiency virus positive patients. *Pharmacoepidemiol Drug Saf.* 2009-9 2009;18(9):848-57. doi:10.1002/pds.1793
2. Modayil RR, Harugeri A, Parthasarathi G, et al. Adverse drug reactions to antiretroviral therapy (ART): an experience of spontaneous reporting and intensive monitoring from ART centre in India. *Pharmacoepidemiol Drug Saf.* 2010-3 2010;19(3):247-55. doi:doi:10.1002/pds.1907
3. Tayal V, ana, Gupta U, Nagpal M, Kumar S. Adverse drug reactions to antiretroviral therapy in aids patients at a tertiary care hospital in India: A prospective observational study. *Indian Journal of Medical Sciences.* 2010 2010;64(6):245-252. doi:doi:10.4103/0019-5359.99597
4. Abaissa SG, Fekade D, Feleke Y, Seboxa T, Diro E. Adverse drug reactions associated with antiretroviral treatment among adult ethiopian patients in a tertiary hospital. *Ethiopian Medical Journal.* 2012 2012;50(2):107-113. doi:doi:
5. Bernal F, Vasquez P, Giadalah C, Rodriguez L, Villagran A. [Incidence of adverse drug reactions in patients initiating or changing antiretroviral therapy]. *Rev Chilena Infectol.* 2013-10 2013;30(5):507-12. Incidencia de reacciones adversas a medicamentos en pacientes que inician o cambian terapia anti-retroviral. doi:10.4067/S0716-10182013000500007
6. Bezabhe WM, Bereznicki LR, Chalmers L, et al. Adverse Drug Reactions and Clinical Outcomes in Patients Initiated on Antiretroviral Therapy: A Prospective Cohort Study From Ethiopia. *Drug Saf.* 2015-7 2015;38(7):629-39. doi:10.1007/s40264-015-0295-7
7. Jha AK, Gadgade A, Shenoy AK, Chowta MN, Ramapuram JT. Evaluation of adverse drug reactions in HIV positive patients in a tertiary care hospital. *Perspect Clin Res.* 2015-1 2015;6(1):34-8. doi:doi:10.4103/2229-3485.148808
8. Mann M, Mengistu A, Gaeseb J, et al. Sentinel site active surveillance of safety of first-line antiretroviral medicines in Namibia. *Pharmacoepidemiol Drug Saf.* 2016-9 2016;25(9):1052-60. doi:doi:10.1002/pds.4022
9. Gudina EK, Teklu AM, Berhan A, et al. Magnitude of Antiretroviral Drug Toxicity in Adult HIV Patients in Ethiopia: A cohort study at seven teaching hospitals. *Ethiop J Health Sci.* 2017-2 2017;27:39-52. doi:10.4314/ejhs.v27i1.5s
10. Isa AM, Abubakar IJ, Chedi BAZ. Adverse drug reactions to antiretroviral drugs and impact on treatment adherence among HIV patients in northwestern Nigeria. *Drugs & Therapy Perspectives.* 2018-10 2018;34(10):488-495. doi:10.1007/s40267-018-0546-7
11. Oumar AA, Dakouo M, Tchibozo A, et al. Antiretroviral-induced adverse drug reactions in HIV-infected patients in Mali: a resource-limited setting experience. *Int J Basic Clin Pharmacol.* 2019-5 2019;8(5):831-836. doi:doi:10.18203/2319-2003.ijbcp20191565
12. Sarraf DP, Rauniar GP, Chhetri R, et al. Pharmacovigilance of Antiretroviral Drugs at B.P. Koirala Institute of Health sciences. *J Nepal Health Res Counc.* 2021-1-21 2020;18(4):596-603. doi:doi:10.33314/jnhrc.v18i4.2634
13. Omolo BO, Njuho PM. Adverse Event Risk Assessment on Patients Receiving Combination Antiretroviral Therapy in South Africa. *International Journal of Statistics in Medical Research.* 2020 2020;9:10-19. doi:doi:10.6000/1929-6029.2020.09.02
14. Ray S, Seth A, Singh S, et al. Short-Term Adverse Drug Reactions to Antiretroviral Therapy in Children with HIV: A Cohort Study. *Indian J Pediatr.* 2023-1 2023;90(1):9-15. doi:doi:10.1007/s12098-021-04045-4

15. Bonfanti P, Valsecchi L, Parazzini F, et al. Incidence of adverse reactions in HIV patients treated with protease inhibitors: a cohort study. *J Acquir Immune Defic Syndr.* 2000-3-1 2000;23(3):236-45. doi:10.1097/00126334-200003010-00004
16. Pujades-Rodriguez M, Dantony E, Pinoges L, et al. Toxicity associated with stavudine dose reduction from 40 to 30 mg in first-line antiretroviral therapy. *PLoS One.* 2011-11-21 2011;6(11):e28112. doi:10.1371/journal.pone.0028112
17. Hongo H, Nagao T, Nakamura K, et al. Safety and Effectiveness Analysis of Dolutegravir in Patients with HIV-1: Interim Report of Post-Marketing Surveillance in Japan. *Adv Ther.* 2021-8 2021;38(8):4480-4504. doi:10.1007/s12325-021-01842-3
18. Ann H, Lee YS, Kim YS, et al. Safety and Effectiveness Analysis of Kivexa(R) (lamivudine/abacavir sulfate) in Human Immunodeficiency Virus Infected Korean Patients. *Infect Chemother.* 2019-6 2019;51(2):150-160. doi:10.3947/ic.2019.51.2.150
19. Tukei VJ, Asiimwe A, Mag, et al. Safety and tolerability of antiretroviral therapy among HIV-infected children and adolescents in Uganda. *J Acquir Immune Defic Syndr.* 2012-3-1 2012;59(3):274-80. doi:10.1097/QAI.0b013e3182423668
20. Tetteh RA, Nartey ET, Lartey M, et al. Adverse events and adherence to HIV post-exposure prophylaxis: a cohort study at the Korle-Bu Teaching Hospital in Accra, Ghana. *BMC Public Health.* 2015-6-20 2015;15(1):573. doi:10.1186/s12889-015-1928-6
21. Joseph AC, Sanalkumar KB, Bharathan CS, Andrews MA, Ajithkumar K. Adverse Effect Profile of Tenofovir Disoproxil Fumarate in Hiv Positive Patients - a Prospective Study. *Journal of Evolution of Medical and Dental Sciences-Jemds.* 2016-4-18 2016;5(31):1659-1662. doi:10.14260/jemds/2016/391
22. Jena A, Sachdeva RK, Sharma A, Wanchu A. Adverse drug reactions to nonnucleoside reverse transcriptase inhibitor-based antiretroviral regimen: a 24-week prospective study. *J Int Assoc Physicians AIDS Care (Chic).* 2009-9 2009;8(5):318-22. doi:10.1177/1545109709343967
23. Sharma A, Vora R, Modi M, Sharma A, Marfatia Y. Adverse effects of antiretroviral treatment. *Indian J Dermatol Venereol Leprol.* 2008-5 2008;74(3):234-7. doi:10.4103/0378-6323.41368
24. Komeda T, Ishii S, Itoh Y, et al. Post-marketing safety and effectiveness evaluation of the intravenous anti-influenza neuraminidase inhibitor peramivir (I): a drug use investigation. *J Infect Chemother.* 2014-11 2014;20(11):689-95. doi:10.1016/j.jiac.2014.07.006
25. Komeda T, Ishii S, Itoh Y, et al. Post-marketing safety and effectiveness evaluation of the intravenous anti-influenza neuraminidase inhibitor peramivir. II: a pediatric drug use investigation. *J Infect Chemother.* 2015-3 2015;21(3):194-201. doi:10.1016/j.jiac.2014.11.009
26. Komeda T, Ishii S, Itoh Y, Sanekata M, Yoshikawa T, Shimada J. Post-marketing safety evaluation of the intravenous anti-influenza neuraminidase inhibitor peramivir: A drug-use investigation in patients with high risk factors. *J Infect Chemother.* 2016-10 2016;22(10):677-84. doi:10.1016/j.jiac.2016.07.004
27. Kashiwagi S, Yoshida S, Yamaguchi H, et al. Safety of the long-acting neuraminidase inhibitor laninamivir octanoate hydrate in post-marketing surveillance. *Int J Antimicrob Agents.* 2012-11 2012;40(5):381-8. doi:10.1016/j.ijantimicag.2012.06.017
28. Nakano T, Yamaguchi H, Chiba T, Shiosakai K, Chikada S, Matsuoka Y. The safety and efficacy of the long-acting neuraminidase inhibitor laninamivir octanoate hydrate for Inhalation Suspension Set in children under the age of 5 in a post-marketing surveillance. *J Infect Chemother.* 2021-10 2021;27(10):1436-1446. doi:10.1016/j.jiac.2021.06.004

29. Dalvi PS, Singh A, Trivedi HR, Mistry SD, Vyas BR. Adverse drug reaction profile of oseltamivir in children. *J Pharmacol Pharmacother.* 2011-4 2011;2(2):100-3. doi:10.4103/0976-500X.81901
30. Itoh S, Nakamura H, Mitamura K, Asano Y, Tahara T. Safety of oseltamivir in infants less than one year old: Prospective surveillance during the 2004–2005 influenza season in Japan. *Journal of Pediatric Infectious Diseases.* 2015 2015;8(2):071-081. doi:10.3233/jpi-130381
31. Nakazawa M, Hara K, Komeda T, Ogura E. Safety and effectiveness of baloxavir marboxil for the treatment of influenza in Japanese clinical practice: A postmarketing surveillance of more than 3000 patients. *J Infect Chemother.* 2020-7 2020;26(7):729-735. doi:doi:10.1016/j.jiac.2020.04.014
32. Tine F, Graviano D, Giannuoli G, et al. An open-safety study of dual antiviral therapy in real-world patients with chronic hepatitis C. *Pharmacoepidemiol Drug Saf.* 2010-11 2010;19(11):1113-23. doi:doi:10.1002/pds.2025
33. Suzuki F, Hatanaka N, o E, Nakamura K, Komoto A. Safety and effectiveness of daclatasvir and asunaprevir dual therapy in patients with genotype 1 chronic hepatitis C: results from postmarketing surveillance in Japan. *Hepatol Int.* 2018-5 2018;12(3):244-253. doi:doi:10.1007/s12072-018-9872-z
34. Ahmed EI, Wahed WYA, Hassan EA, Ahmed TI. Study of Adverse Drug Effects of Direct-Acting Antivirals for Chronic HCV Infection at Fayoum Governorate, Egypt - A Pharmacovigilance Study. *Curr Drug Saf.* 2018 2018;13(3):187-195. doi:doi:10.2174/1574886313666180716111529
35. Mizokami M, Liu LJ, Fujiyama N, et al. Real-world safety and effectiveness of ledipasvir/sofosbuvir for the treatment of chronic hepatitis C virus genotype 1 in Japan. *J Viral Hepat.* 2021-1 2021;28(1):129-141. doi:doi:10.1111/jvh.13395
36. Kim CW, Kim CS, Kim HY, et al. Large-scale surveillance study of the safety and effectiveness of entecavir in Korean patients with chronic hepatitis B. *Korean J Intern Med.* 2018-1 2018;33(1):91-101. doi:doi:10.3904/kjim.2016.111
